15 **Abstract**

16 COVID-19 impacted multiple facets of life, with implications on physical, mental, and  
17 societal health. Specifically, long COVID and related losses have exacerbated complex and  
18 prolonged grief responses and mental disorders including depression and anxiety. These mental  
19 health concerns are in turn associated with increased detrimental coping strategies including  
20 substance use disorders (SUD). The social and interpersonal implications of SUD are varied.  
21 Secondary data analyses from the National Survey on Drug Use and Health (NSDUH) collected  
22 during the COVID-19 pandemic revealed an increase in substance use behaviors and mental health  
23 problems. Self-reported religious activities had a positive meditating effect on reducing substance  
24 use behaviors. Accordingly, we explored the importance of one's religion and faith in coping with  
25 stress, grief, and mental health challenges during the COVID-19 pandemic, highlighting the impact  
26 of religion and faith in bringing hope and purpose during periods of loss, grief, mental health  
27 challenges, and SUD.

28

29

## 30 **Introduction**

31           Nearly three years post-onset of the COVID-19 pandemic, humanity has continued to  
32 struggle to return to a sense of normality from the devastating impacts of the SARS-CoV-2 virus.  
33 At a time when many nations are rescinding large-scale public health orders and restrictions, some  
34 even declaring an end to the COVID-19 pandemic altogether, the long-term implications of the  
35 pandemic have been largely overlooked. Regardless of the rationale, whether that be overall  
36 fatigue, a reticence to address controversial issues, or issues not yet identified, it does appear that  
37 a wave of potential public health crises currently exists and may persist well into the foreseeable  
38 future.

39           COVID-19 could be categorized into two distinct disease phases: acute COVID and long  
40 COVID, which may occur from 4 - 12 weeks following initial infection (Nalbandian et al., 2021).  
41 Long COVID may persist beyond three months from the initial infection and may continue for at  
42 least two months following the cessation of symptoms which cannot be explained by alternative  
43 diagnoses (CDC, 2022b). In many cases, long-term symptoms can persist for many months.  
44 Recently, the Centers for Disease Control and Prevention (CDC) showed that 1-in-5 people aged  
45 18-to-64 and 1-in-4 people older than age 65 are likely sufferings from long COVID (Bull-  
46 Otterson et al., 2022). It is likely that are many more undocumented cases of long COVID.

### 47 ***Psychological, mental health & societal impact of long COVID***

48           Long COVID symptoms may include fatigue, shortness of breath, heart palpitations, sleep  
49 dysfunction, muscle or joint pain, dizziness, altered menstrual cycles, as well as psychological  
50 symptoms such as cognitive dysfunction, anxiety, depression, difficulty thinking or concentrating,  
51 attention disorder, and post-exertional malaise (CDC, 2022b; Lopez-Leon et al., 2021). While  
52 these symptoms may present in a very non-specific manner, they can nonetheless take a toll on

53 patients' health and can lead to adverse mental health and behavioral outcomes, and have a  
54 noticeable impact on activities of daily living.

55         Pandemic-related mental health and substance use disorders (SUD) have risen in incidence  
56 and prevalence, exacerbating an already elevated mental health crisis in the United States (U.S.)  
57 and beyond. Individuals who have experienced compound stressors such as acute and chronic  
58 illness (e.g., long COVID), the loss of loved ones, and financial strain may experience  
59 compounded fear, anxiety, anger, and depression as responses to coping with these pandemic-  
60 related stressors (Levine, 2022). Systems-based frameworks which have received empirical  
61 support have highlighted the interrelatedness of physical health, financial health, mental health,  
62 and spiritual well-being (She, Wang, Canada, & Poston, 2022; K. Smith et al., 2022). In the  
63 Household Pulse Survey, 42.6% of U.S. adults reported feelings of anxiety and depression in 2020  
64 and these rates have remained high throughout 2021 and 2022 (CDC, 2022c). In contrast, only  
65 about 9.5-to-11.7% of U.S. adults reported debilitating feelings of anxiety and depression in 2019  
66 (CDC, 2019). This represents an approximately four-fold increase in identified anxiety and  
67 depression disorders as a direct result of the COVID-19 pandemic, which could very well persist  
68 long into the foreseeable future. Consequently, lingering mental health struggles and pandemic-  
69 related stresses have attributed to an increase in drug-related overdose deaths resulting in 107,000  
70 deaths in 2021-2022 in the U.S. alone. In contrast, before the pandemic, drug overdose deaths in  
71 2019 in the U.S. were around 68,000 (Ahmad, Cisewski, Rossen, & Sutton, 2022).

72         In contrast, human interaction and experiential learning may lead to positive stress-related  
73 coping mechanisms, the development of life lessons, and quality of life improvements. The  
74 pandemic has, essentially, been a generational mental health crash course by forcing people to  
75 learn to cope with multiple stresses occurring simultaneously without many of the social and

76 emotional resources typically available to them. Positive coping skills can help individuals, their  
77 loved ones, and their community increase resilience. Furthermore, when adaptive coping tools are  
78 unavailable, vulnerability to maladaptive coping approaches including increased consumption of  
79 alcohol, illegal or recreational drug use like marijuana, heroin, cocaine, methamphetamines, and  
80 misuse of prescription drugs like opioids increases (CDC, 2022a).

### 81 ***COVID-19 pandemic and grief response***

82 Much like other viral outbreaks and natural disasters, COVID-19 will likely be associated  
83 with prolonged grief responses or disorders in affected communities (Eisma, Boelen, & Lenferink,  
84 2020). These responses are either primary or secondary and can be attributed to grief for the loss  
85 of former self-identity and lifestyle, bereavement, or grief for the changed world post-pandemic  
86 (Verdery, Smith-Greenaway, Margolis, & Daw, 2020). With greater than one million lives lost  
87 during the pandemic, many of these deaths occurring in isolation, this had a significant impact on  
88 the dying and grieving process for both the patient and their loved ones (Galbadage, Peterson,  
89 Wang, Wang, & Gunasekera, 2020). Rites of passage and rituals such as these are examples of  
90 deep, meaningful, and emotionally charged human experiences. The disruption or loss of integral  
91 experiences associated with the death and burial of loved ones has forced people to cope with  
92 stress and unresolved tensions (Corpuz, 2021). Consequently, longer-term bereavement among  
93 loved ones who lost their relatives may have negatively impacted an individual's ability to fully  
94 experience and navigate the various stages of grieving: denial, anger, bargaining, depression, and  
95 acceptance (Gonçalves Júnior, Moreira, & Rolim Neto, 2020).

### 96 ***Substance use & mental health disorders***

97 As a mental health disorder, SUD affects an individual's behavior resulting in an inability  
98 to control the use of legal or illegal drugs (Hasin et al., 2013). Patients diagnosed with SUD are

99 likely to also be diagnosed with additional mental health disorders, with co-morbid SUD and  
100 mental health disorders more common than SUD alone (Ross & Peselow, 2012). For example,  
101 studies have indicated that high rates of SUD have been observed concomitantly with anxiety  
102 disorders or depressive states (Conway, Compton, Stinson, & Grant, 2006; Wolitzky-Taylor,  
103 Operskalski, Ries, Craske, & Roy-Byrne, 2011). During the COVID-19 pandemic, an increase in  
104 comorbid SUD and mental health disorders were observed (Johnson, 2021). While substance abuse  
105 is a coping mechanism often used in response to stress and grief, it is maladaptive because it  
106 ultimately complicates and hinders adaptive grief and stress responses. This dynamic has been at  
107 play throughout the COVID-19 pandemic (Caparrós & Masferrer, 2020).

108         While it is believed that long COVID can lead to an exacerbation of mental health disorders  
109 and an associated increase in substance use, there is a knowledge gap in mediating factors that can  
110 help mitigate such emerging public health crises. Therefore, the rationale for this comparative data  
111 assessment was to investigate potential associations between pandemic-associated mental health  
112 diseases, the use of substances as a coping mechanism, and the protective role of religious  
113 activities, which for many represents a crucial source of social support and adaptive coping and  
114 meaning-making. Specifically, our group investigated the degree to which attending religious  
115 services functioned as a protective factor for substance use among individuals with and without  
116 serious psychological distress (SPD) during the height of the COVID-19 pandemic.

## 117 **Methods**

### 118 *Secondary data source*

119         In this study, we analyzed data obtained from the 2020 National Survey on Drug Use and  
120 Health (NSDUH). Data are composed of comprehensive face-to-face household interviews of non-  
121 institutionalized individuals aged 12 or older. Excluded interviewees included individuals

122 incarcerated in prison, members of the active-duty military, residents of long-term medical care,  
123 and people without housing and not living in shelters. NSDUH is a primary source of information  
124 on the use of tobacco, alcohol, illegal drug use, and mental illness in the U.S.

125 Starting in 2020, NSDUH began to use both in-person interviews and web-based  
126 interviews. NSDUH data were only collected in Quarters 1 (January to March) and 4 (October to  
127 December) of 2020. Most Quarter 1 data were collected via in-person interviews, whereas online  
128 data were dominant in Quarter 4 with limited in-person data collection (SAMHSA, 2021). In 2020,  
129 NSDUH collected data from 36,284 respondents aged 12 or older. NSDUH is publicly available,  
130 de-identified data, and hence did not require IRB approval.

### 131 *Study variables*

#### 132 *Current marijuana use (CMU)*

133 The main dependent variable utilized in this investigation was CMU, highlighted by  
134 NSDUH data. Respondents who indicated marijuana use in the past 30 days were considered  
135 current users. Since marijuana is the most commonly used illegal drug, it was used as a  
136 representation of overall substance use following the Substance Abuse and Mental Health Services  
137 Administration (SAMHSA) guidelines.

#### 138 *Past-month serious psychological distress*

139 The NSDUH incorporates the Kessler-6 (K6) screening instrument (questionnaire) to  
140 assess serious psychological distress (SPD) among respondents aged 18 or older only via a 5-point  
141 Likert scale. Scores greater than 13 were categorized as having past-month SPD, whereas scores  
142 less than 13 were categorized as not having past-month SPD.

#### 143 *Frequency of religious service attendance*

144           The NSDUH also surveyed religious service attendance which was measured by asking  
145   “During the past 12 months, how many times did you attend religious services? Please do not  
146   include special occasions such as weddings, funerals, or other special events in your answer.”  
147   Possible response options were 0 times, 1 to 2 times, 3 to 5 times, 6 to 24 times, 25 to 52 times,  
148   and more than 52 times. Responses were categorized into three levels: (1) 0 times, (2) 1 to 24  
149   times, and (3) more than 25 times.

#### 150   *The influence of religious beliefs on one’s decision*

151           Survey respondents were asked to indicate their level of agreement with the following  
152   question “My religious beliefs influence my decisions.” Possible response options were strongly  
153   disagreed, disagree, agree, and strongly disagree. Responses were categorized into two levels: (1)  
154   strongly disagree/disagree and (2) agree/strongly agree.

#### 155   *Sociodemographic characteristics*

156           Selected sociodemographic characteristics were included in the analysis as covariates,  
157   including sex (male and female), age (18 - 25, 26 - 34, 35 - 49, and 50 +), education (less than high  
158   school, high school graduate, some college, and college graduate), and employment status in the  
159   past week (full-time, part-time, unemployed/on layoff or looking for work, and others).  
160   Race/ethnicity was recorded into 4 levels (non-Hispanic NH-White, NH-Black, Hispanic, and  
161   other). Due to the small sample size, we combined NH-Asian, NH-Native American/Alaska  
162   Natives, NH-Native Hawaiian/Other Pacific Islanders, and people with multiple races into one  
163   group.

#### 164   *Statistical Analysis*

165           Descriptive statistics were conducted to examine sample characteristics. We then estimated  
166   the prevalence of CMU by SPD status and then the prevalence of CMU by religious factors. Next,



167 we performed the multivariate logistic regression, adjusting for all other covariates including sex,  
168 age, race/ethnicity, education, and employment status. The multivariate logistic regression was  
169 conducted separately for those with SPD and those without SPD to examine the role of religion in  
170 marijuana use during the COVID-19 pandemic. The NSDUH sampling weights were adjusted for  
171 all analyses, to account for the complexities of the survey. All analyses were conducted using  
172 STATA Version 17 (Stata, College Station, TX).

## 173 **Results**

### 174 *Sample characteristics*

175 Table 1 provides the overall characteristics of the adult sample from the 2020 NSDUH ( $N$   
176 = 27,170). The majority of the study sample was composed of adults aged 50 years of age or older  
177 (46.1%), and NH-White (62.7%), and maintained a full-time employment status (43.1%). In 2020,  
178 according to the NSDUH survey results, approximately 7.0% of U.S. adults had SPD based on the  
179 Kessler-6 score in the past month. Approximately, 49.1% of the survey respondents reported that  
180 they did not attend any religious services or participate in any religious activities. Respondents  
181 (29.5%) also indicated that they were infrequent attendants to religious services (1 - 24 times per  
182 year) and 21.4% reported they were frequent attendants (25 times per year or more). Yet, in this  
183 sample, 67.0% of respondents reported that their religious belief influenced their behavioral  
184 decisions.

### 185 *The presence of SPD & association with CMU*

186 The prevalence of CMU (within the past 30 days) among U.S. adults was 12.1% in 2020.  
187 CMU had a higher prevalence among people with SPD (27.2%) compared to those without  
188 (10.9%) (Figure 1 a). Similar patterns were observed in the lifetime and past-year prevalence of  
189 marijuana use. In 2020, 18.2% of U.S. adults indicated marijuana use in the past year. By SPD

190 status, those with SPD (39.8%) were more likely to report past-year marijuana use than those  
191 without (16.5%) (Figure 1 b). In 2020, among U.S. adults, the lifetime prevalence of marijuana  
192 use was 48.4%. Among those with SPD, 68.8% (95% CI = 64.7 - 72.6) reported having ever used  
193 marijuana, which was significantly higher than in those without SPD (46.8%, 95% CI = 45.6 -  
194 48.0) (Figure 1 c). Multivariate logistic regression analysis also showed that SPD was a significant  
195 factor associated with CMU. Those with SPD had nearly 2 times greater likelihood of being current  
196 users than those without SPD (AOR = 2.02, 95% CI = 1.83 - 2.23) (Table 3).

### 197 *Religious service attendance & CMU*

198 The prevalence of CMU decreased with the number of religious service attendance (Table  
199 2). Among people with SPD, the prevalence of CMU was 29.3%, 24.0%, and 22.3% for non-  
200 attendants, infrequent attendants, and frequent attendants, respectively. Among people without  
201 SPD, the prevalence of CMU was 15.2%, 9.4%, and 2.9% for non-attendants, infrequent  
202 attendants, and frequent attendants, respectively. The prevalence of CMU also varied depending  
203 on individuals' religious beliefs. Among people with SPD, those who reported that religious beliefs  
204 would not influence their decisions were more likely to report CMU (30.9%) than those who  
205 reported that religious beliefs would influence their decisions (24.0%). Similarly, among people  
206 without SPD, CMU was more common among those who reported that religious beliefs would  
207 influence their decisions (17.0%) than those who reported that religious beliefs would not  
208 influence their decisions (7.7%). Overall, results indicated that individuals involved in some form  
209 of communal religious activity were less likely to use marijuana.

210 Multivariate logistic regression analysis also showed that religious service attendance  
211 played a significant role in marijuana use for both those with SPD and those without SPD, although  
212 the magnitude of the association varied (Table 3). There was a strong association observed among

213 people with SPD. Among people with SPD, frequent religious service attendance was associated  
214 with lower odds of CMU (AOR = 0.58, 95% CI = 0.40 - 0.84) (Table 3). Infrequent religious  
215 service attendance was not associated with CMU. Among people without SPD, both infrequent  
216 (AOR = 0.79, 95% CI = 0.71 - 0.87) and frequent (AOR = 0.27, 95% CI = 0.23 - 0.32) religious  
217 service attendance was associated with lower odds of CMU. Religious belief was another  
218 important factor associated with CMU. Considering religion as an important factor in their  
219 decision was associated with decreased odds of CMU for both people with SPD (AOR = 0.66,  
220 95% CI = 0.55 - 0.80) and people without SPD (AOR = 0.61, 95% CI = 0.56 - 0.67).

### 221 *Age & CMU*

222 Additionally, age was negatively associated with marijuana use for both people with SPD  
223 and people without SPD (Table 3). Among those with SPD, those aged 26 - 34 (AOR = 0.77, 95%  
224 CI = 0.62 - 0.97), those aged 35 - 49 (AOR = 0.68, 95% CI = 0.53 - 0.87), and those aged 50 +  
225 (AOR = 0.30, 95% CI = 0.19 - 0.47) had a lower likelihood of CMU than those aged 18 - 25.  
226 Similarly, among those without SPD, those aged 26 - 34 (AOR = 0.79, 95% CI = 0.71 - 0.88),  
227 those aged 35 - 49 (AOR = 0.58, 95% CI = 0.52 - 0.65), and those aged 50 + (AOR = 0.32, 95%  
228 CI = 0.29 - 0.37) had lower likelihood of CMU than those aged 18 - 25.

### 229 *Additional factors & CMU*

230 Sex, race/ethnicity, education, and employment status were associated with CMU only  
231 among people without SPD (Table 3). Women were less likely to report CMU than men (AOR =  
232 0.74, 95% CI = 0.69 - 0.81). Compared to NH-White, NH-Blacks were more likely to report CMU  
233 (AOR = 1.23, 95% CI = 1.07 - 1.41) but Hispanics (AOR = 0.73, 95% CI = 0.64 - 0.83) and other  
234 racial/ethnic groups (AOR = 0.72, 95% CI = 0.62 - 0.83) were less likely to report CMU.  
235 Individuals who completed some college had increased odds of CMU (AOR = 1.29, 95% CI =

236 1.10 - 1.51) than individuals with less than a high school diploma. Unemployed individuals also  
237 had increased odds of CMU (AOR = 1.56, 95% CI = 1.31 - 1.85) than full-time employees.

### 238 ***Conclusion***

239 Religion service attendance is associated with a lower rate of both substance use behaviors  
240 and SPD. Religious communities and faith-based activities are likely to play a mediating role in  
241 reducing substance use behaviors in people with SPD during the COVID-19 pandemic.

### 242 **Discussion**

243 COVID-19 impacted our world in many ways. The extensive nature to which COVID-  
244 related mental health and accompanying substance use problems are manifesting in the U.S. is just  
245 starting to emerge. Understandably, substance use and psychological distress increased during the  
246 pandemic. Herein, our findings empirically confirmed this association between substance use and  
247 psychological distress during the COVID-19 pandemic. Thus, public health practitioners need to  
248 recognize the exigent, yet potentially ominous nature by which these issues could have future  
249 implications and develop strategies toward a greater understanding of the influence of long-  
250 COVID on aspects of mental health and substance abuse.

### 251 ***Current understanding of long COVID***

252 To date, no unified consensus exists to precisely describe etiological and mechanistic  
253 functional determinants that may lead to the development of long COVID. However, researchers  
254 and clinicians working directly with COVID-19 patients over the past three years have posited  
255 three hypotheses (Couzin-Frankel, 2022): (1) micro blood clots leading to micro-infarctions and  
256 vascular damage, (2) persistent replicating viral particles causing localized inflammation (3)  
257 dysfunctional or hyperactive immunological responses causing localized tissue damage.

258           Several investigative studies have revealed immune activation and inflammation in the  
259 CSF and brains of COVID-19 patients (Yang et al., 2021). Immune cells become activated to fight  
260 infection by releasing various proteins including cytokines. However, prolonged cytokine release  
261 can lead to neuroinflammation that can destabilize the blood-brain barrier, interfere with  
262 neurological function, and ultimately lead to neuronal damage (Boziki et al., 2020). Furthermore,  
263 neuroimaging studies of patients post-acute COVID-19 showed changes in brain structure,  
264 including microstructural and functional changes within the hippocampus, a brain region critical  
265 for memory formation, anxiety, mood, and stress responses (Douaud et al., 2022; Qin et al., 2021).  
266 Therefore, persistent neuroinflammation as a result of acute COVID-19 infection in many cases  
267 can have off-target effects and serve as primary drivers of neurologic symptoms frequently  
268 observed in long COVID, which may in part explain the increase in mental health issues during  
269 the pandemic (Ellul et al., 2020).

#### 270 ***Study limitations***

271           We used cross-sectional NSDUH data in the general population of U.S. adults aged 18 and  
272 older. Therefore, our study findings can't be generalized across other countries. Additional studies  
273 conducted in different countries and with longitudinal data are needed to provide more robust  
274 evidence of the relationship between SPD and substance use, and the role of faith in this  
275 relationship. Furthermore, due to the cross-sectional nature of the data, we could not establish  
276 causality between SPD and substance use. Some caution is needed when interpreting our study  
277 findings as they indicate only associations. Finally, the NSDUH did not provide information about  
278 the religious affiliations of study participants. Hence, we could not specify the relationship  
279 between faith, SPD, and substance use by type of religion. Moreover, we are unable to identify the  
280 specific mechanisms of change active in religious activity, whether it relates to general social

281 support, meaning-making, or even religious stigma to substance use, for example. Further study is  
282 warranted to determine the specific and multi-faceted role that religion might play in the  
283 relationship between mental illness and substance use.

#### 284 *Association between SPD & SUD*

285 Consistent with previous research, our group found a higher prevalence of CMU in people  
286 with SPD (Weinberger et al., 2019). Adults with SPD were more likely to report prior month,  
287 previous year, and lifetime marijuana use than adults without SPD. Previous studies provided a  
288 plausible mechanism linking psychological distress and marijuana use as a coping strategy  
289 (Aselton, 2012). Another recent study found an association between psychological distress and  
290 coping-oriented marijuana use among pregnant women during the COVID-19 outbreak (C. L.  
291 Smith et al., 2022). Given the substantial impact of COVID-19 on mental health, our findings are  
292 noteworthy. Since the pandemic and its long-term effects are still ongoing, it is important to ensure  
293 that mental health screening, referral, and treatment services are made available, and delivered  
294 effectively. Especially since mental health interventions aiming to promote positive coping  
295 mechanisms and stress management strategies may play a vital role in preventing and reducing  
296 marijuana use.

297 Psychological stressors such as anxiety, loneliness, and changes in lifestyle during the  
298 pandemic were associated with sustained marijuana use (Rhew, Cadigan, & Lee, 2021). This is a  
299 major risk factor for developing or worsening mental illnesses including depression and anxiety,  
300 leading to SUD (Arnsten, 2015; McEwen, 2012). The anxiolytic effects of marijuana are mediated  
301 through the increased cannabinoid receptor activation by the two primary active ingredients of  
302 marijuana. They are  $\Delta$ 9-tetrahydrocannabinol (THC), the psychoactive compound of marijuana,

303 and cannabidiol. THC may reduce distress and anxiety at a low dose, but can also increase negative  
304 mood and exacerbate anxiety at higher doses (Childs, Lutz, & de Wit, 2017).

### 305 ***Religion, faith, mental health, & substance use behavior***

306 Religious affiliation and one's dedication to faith are closely tied to a person's source of  
307 hope, sense of purpose in life, coping skills, and social support network (Ano & Vasconcelles, 2005;  
308 Berthold & Ruch, 2014). Within the context of mass trauma due to natural disasters, religious  
309 participation was found to contribute to positive mental health outcomes through the mechanisms  
310 of social support and positive religious coping (Wood et al., 2021). Practicing faith increases life  
311 satisfaction compared to those who have no religious affiliation or do not practice, and can protect  
312 against negative emotions that can lead to depression and anxiety (Berthold & Ruch, 2014). Coping  
313 through stressful life events, such as the pandemic, by religious means can allow one to experience  
314 positive psychological outcomes evident through lowered depression and anxiety; while non-  
315 religious coping mechanisms can at times lead to greater distress (Ano & Vasconcelles, 2005). These  
316 outcomes have bolstered religious service attendance as a means of coping with pandemic stress,  
317 and at the same time have disincentivized sustained marijuana use as a possible coping activity.

318 Our study findings showed that religion plays a salient role in the relationship between  
319 mental illness and substance use. Religious beliefs, practices, and spirituality have been observed  
320 to promote mental health through positive religious coping, positive beliefs, and community  
321 support as a means to cope with stress and illness (Weber & Pargament, 2014). For example, the  
322 adaptive coping benefits of religious practices such as prayer may potentially be attributed to  
323 religion's capacity to help individuals approach instead of avoiding the reality of themselves and  
324 their circumstances (Lowe, Wang, & Chin, 2022). Virtues such as humility and gratitude have also  
325 been identified as mediators of the association between religious commitment and eudemonic

326 well-being longitudinally (Jankowski, Sandage, Wang, & Crabtree, 2022). Religious beliefs also  
327 provide a sense of purpose for those that believe in a God and help provide an understanding of  
328 role and purpose (Koenig, 2009). The understanding of great good and the assurance faith and  
329 religion provide for people influences the choices they make including avoidance of substance use  
330 behaviors. Another study looking at the NESARC-III survey data showed that among various  
331 religiosity factors, attending religious services was a strong substance use protective factor (Livne  
332 et al., 2021). Using the most recent data our study results align with this study's findings and further  
333 support the importance of religion and faith as deterrence of substance use even in the context of  
334 the COVID-19 pandemic.

335

### 336 **Competing interests**

337 The authors declare that the research was conducted in the absence of any commercial or financial  
338 relationships that could be construed as potential competing interests.

339



340 **Tables**

341

342 **Table 1. Sample Characteristics from NSDUH 2020 (N = 27,170)**

343

| <b>Variable</b>                                                   | <b>N</b> | <b>% [95% CI]</b> |
|-------------------------------------------------------------------|----------|-------------------|
| <b>Sex:</b>                                                       |          |                   |
| Male                                                              | 12185    | 48.3 [47.2-49.4]  |
| Female                                                            | 14985    | 51.7 [50.6-52.8]  |
| <b>Age:</b>                                                       |          |                   |
| 18-25                                                             | 7946     | 13.3 [12.7-13.9]  |
| 26-34                                                             | 5711     | 16.1 [15.4-16.8]  |
| 35-49                                                             | 7418     | 24.6 [23.7-25.5]  |
| 50+                                                               | 6095     | 46.1 [44.7-47.4]  |
| <b>Race/ethnicity:</b>                                            |          |                   |
| NH-White                                                          | 18144    | 62.7 [61.1-64.2]  |
| NH-Black                                                          | 2437     | 12.1 [11.1-13.2]  |
| Hispanic                                                          | 3728     | 16.7 [15.5-18.0]  |
| Others                                                            | 2861     | 8.51 [7.94-9.12]  |
| <b>Education:</b>                                                 |          |                   |
| Less than high school                                             | 2244     | 11.3 [10.5-12.3]  |
| High school graduate                                              | 5683     | 27.7 [26.5-29.0]  |
| Some college                                                      | 8371     | 30.5 [29.5-31.5]  |
| College graduate                                                  | 10872    | 30.5 [29.2-31.7]  |
| <b>Employment status in the past week:</b>                        |          |                   |
| Worked at a full-time job                                         | 12569    | 43.1 [42.1-44.2]  |
| Worked at a part-time job                                         | 3333     | 10.5 [9.9-11.0]   |
| Unemployed/on layoff, looking for work                            | 1140     | 3.9 [3.4-4.3]     |
| Others                                                            | 8835     | 42.6 [41.3-43.8]  |
| <b>Past-month SPD</b>                                             |          |                   |
| No                                                                | 24443    | 92.8 [92.3-93.3]  |
| Yes                                                               | 2727     | 7.2 [6.7-7.7]     |
| <b>Frequency of religious service attendance in the past year</b> |          |                   |
| 0 time                                                            | 13604    | 49.1 [47.9-50.3]  |
| 1-24 times                                                        | 7689     | 29.5 [28.5-30.4]  |
| More than 25 times                                                | 5023     | 21.4 [20.3-22.6]  |
| <b>My religious beliefs influence my decisions</b>                |          |                   |
| Disagree                                                          | 10191    | 33.0 [31.8-34.2]  |
| Agree                                                             | 15884    | 67.0 [65.8-68.2]  |

344

345

346 **Table 2. Prevalence of CMU by Religious Factors**

347

| Variable                                                          | People with SPD <sup>a</sup><br>(N=2,699) |                  | People without SPD <sup>a</sup><br>(N=23,376) |                  |
|-------------------------------------------------------------------|-------------------------------------------|------------------|-----------------------------------------------|------------------|
|                                                                   | N                                         | % [95% CI]       | N                                             | % [95% CI]       |
| <b>Frequency of religious service attendance in the past year</b> |                                           |                  |                                               |                  |
| 0 time                                                            | 1693                                      | 29.3 [25.8-33.1] | 11911                                         | 15.2 [14.1-16.4] |
| 1-24 times                                                        | 773                                       | 24.0 [19.9-28.5] | 6916                                          | 9.4 [8.3-10.6]   |
| More than 25 times                                                | 249                                       | 22.3 [11.4-39.1] | 4774                                          | 2.9 [2.2-3.8]    |
| <b>My religious beliefs influence my decisions</b>                |                                           |                  |                                               |                  |
| Disagree                                                          | 1407                                      | 30.9 [27.4-34.6] | 8784                                          | 17.0 [15.7-18.4] |
| Agree                                                             | 1292                                      | 24.0 [20.4-28.0] | 14592                                         | 7.7 [6.8-8.7]    |

348 <sup>a</sup> SPD: serious psychological distress

349

350 **Table 3. Results from Multivariate Logistic Regression Predicting CMU Among U.S.**  
 351 **Adults**  
 352

|                                                                                 | <b>Overall<br/>(N=25,382)</b> | <b>People with SPD<sup>a</sup><br/>(N=2,617)</b> | <b>People without SPD<sup>a</sup><br/>(N=22,765)</b> |
|---------------------------------------------------------------------------------|-------------------------------|--------------------------------------------------|------------------------------------------------------|
| <b>Variable</b>                                                                 | <b>AOR [95% CI]</b>           | <b>AOR [95% CI]</b>                              | <b>AOR [95% CI]</b>                                  |
| <b>SPD<sup>a</sup> status (ref.= Without SPD<sup>a</sup>)</b>                   |                               |                                                  |                                                      |
| With SPD <sup>a</sup>                                                           | 2.02 [1.83-2.23]**            | -                                                | -                                                    |
| <b>Sex (ref.=male)</b>                                                          |                               |                                                  |                                                      |
| Female                                                                          | 0.78 [0.72-0.84]**            | 1.02 [0.84-1.22]                                 | 0.74 [0.69-0.81]**                                   |
| <b>Age (ref.=18-25)</b>                                                         |                               |                                                  |                                                      |
| 26-34                                                                           | 0.79 [0.72-0.87]**            | 0.77 [0.62-0.97]*                                | 0.79 [0.71-0.88]**                                   |
| 35-49                                                                           | 0.59 [0.54-0.65]**            | 0.68 [0.53-0.87]*                                | 0.58 [0.52-0.65]**                                   |
| 50+                                                                             | 0.32 [0.28-0.36]**            | 0.30 [0.19-0.47]*                                | 0.32 [0.29-0.37]**                                   |
| <b>Race/ethnicity (ref.=NH-White)</b>                                           |                               |                                                  |                                                      |
| NH-Black                                                                        | 1.24 [1.09-1.41]**            | 1.28 [0.90-1.82]                                 | 1.23 [1.07-1.41]**                                   |
| Hispanic                                                                        | 0.74 [0.66-0.84]**            | 0.84 [0.64-1.10]                                 | 0.73 [0.64-0.83]**                                   |
| Others                                                                          | 0.75 [0.66-0.85]**            | 0.92 [0.70-1.20]                                 | 0.72 [0.62-0.83]**                                   |
| <b>Education (ref.=Less than high school)</b>                                   |                               |                                                  |                                                      |
| High school graduate                                                            | 1.20 [1.03-1.40]*             | 1.32 [0.95-1.83]                                 | 1.16 [0.98-1.38]                                     |
| Some college                                                                    | 1.26 [1.09-1.46]*             | 1.14 [0.83-1.57]                                 | 1.29 [1.10-1.51]*                                    |
| College graduate                                                                | 0.95 [0.82-1.11]              | 0.93 [0.66-1.31]                                 | 0.95 [0.81-1.13]                                     |
| <b>Employment status in the past week (ref.=full time)</b>                      |                               |                                                  |                                                      |
| Part-time job                                                                   | 1.04 [0.93-1.17]              | 0.95 [0.73-1.23]                                 | 1.07 [0.94-1.21]                                     |
| Unemployed/on layoff, looking for work                                          | 1.49 [1.28-1.74]**            | 1.37 [0.99-1.89]                                 | 1.56 [1.31-1.85]**                                   |
| Others                                                                          | 1.04 [0.95-1.13]              | 1.10 [0.89-1.35]                                 | 1.02 [0.93-1.13]                                     |
| <b>Frequency of religious service attendance in the last year (ref.=0 time)</b> |                               |                                                  |                                                      |
| 1-24 times                                                                      | 0.82 [0.75-0.89]**            | 1.00 [0.82-1.23]                                 | 0.79 [0.71-0.87]**                                   |
| More than 25 times                                                              | 0.30 [0.26-0.35]**            | 0.58 [0.40-0.84]**                               | 0.27 [0.23-0.32]**                                   |
| <b>My religious beliefs influence my decisions (ref.=disagree)</b>              |                               |                                                  |                                                      |
| Agree                                                                           | 0.62 [0.57-0.68]**            | 0.66 [0.55-0.80]**                               | 0.61 [0.56-0.67]**                                   |

353 <sup>a</sup> SPD: serious psychological distress

354 Note. AOR=Adjusted Odds Ratio; CI=Confidence Interval.

355 \*\* < .01, \* < .05

356

357 **References**

358

359 Ahmad, F. B., Cisewski, J. A., Rossen, L. M., & Sutton, P. (2022). Provisional Drug Overdose  
360 Death Counts. *National Center for Health Statistics*. Retrieved from

361 <https://www.cdc.gov/nchs/nvss/vsrr/drug-overdose-data.htm>

362 Ano, G. G., & Vasconcelles, E. B. (2005). Religious coping and psychological adjustment to  
363 stress: a meta-analysis. *J Clin Psychol*, *61*(4), 461-480. doi:10.1002/jclp.20049

364 Arnsten, A. F. (2015). Stress weakens prefrontal networks: molecular insults to higher cognition.  
365 *Nat Neurosci*, *18*(10), 1376-1385. doi:10.1038/nn.4087

366 Aselton, P. (2012). Sources of stress and coping in American college students who have been  
367 diagnosed with depression. *J Child Adolesc Psychiatr Nurs*, *25*(3), 119-123.

368 doi:10.1111/j.1744-6171.2012.00341.x

369 Berthold, A., & Ruch, W. (2014). Satisfaction with life and character strengths of non-religious  
370 and religious people: it's practicing one's religion that makes the difference. *Front*

371 *Psychol*, *5*, 876. doi:10.3389/fpsyg.2014.00876

372 Boziki, M. K., Mentis, A. A., Shumilina, M., Makshakov, G., Evdoshenko, E., & Grigoriadis, N.  
373 (2020). COVID-19 Immunopathology and the Central Nervous System: Implication for

374 Multiple Sclerosis and Other Autoimmune Diseases with Associated Demyelination.

375 *Brain Sci*, *10*(6). doi:10.3390/brainsci10060345

376 Bull-Otterson, L., Baca, S., Saydah, S., Boehmer, T. K., Adjei, S., Gray, S., & Harris, A. M.

377 (2022). Post-COVID Conditions Among Adult COVID-19 Survivors Aged 18-64 and

378 ≥65 Years — United States, March 2020–November 2021. *MMWR Morb Mortal Wkly*

379 *Rep*, *71*, 713–717. doi:<http://dx.doi.org/10.15585/mmwr.mm7121e1>

- 380 Caparrós, B., & Masferrer, L. (2020). Coping Strategies and Complicated Grief in a Substance  
381 Use Disorder Sample. *Front Psychol*, *11*, 624065. doi:10.3389/fpsyg.2020.624065
- 382 CDC. (2019). National Health Interview Survey, Estimates of Mental Health Symptomatology  
383 by Month of Interview: United States, 2019. *National Center for Health Statistics*.
- 384 CDC. (2022a). Coping With Stress. Retrieved from [https://www.cdc.gov/mentalhealth/stress-](https://www.cdc.gov/mentalhealth/stress-coping/cope-with-stress/index.html)  
385 [coping/cope-with-stress/index.html](https://www.cdc.gov/mentalhealth/stress-coping/cope-with-stress/index.html)
- 386 CDC. (2022b). Long COVID or Post-COVID Conditions. Retrieved from  
387 <https://www.cdc.gov/coronavirus/2019-ncov/long-term-effects/index.html>
- 388 CDC. (2022c). Long COVID: Household Pulse Survey. June 22, 2022. Retrieved from  
389 <https://www.cdc.gov/nchs/covid19/pulse/long-covid.htm>
- 390 Childs, E., Lutz, J. A., & de Wit, H. (2017). Dose-related effects of delta-9-THC on emotional  
391 responses to acute psychosocial stress. *Drug Alcohol Depend*, *177*, 136-144.  
392 doi:10.1016/j.drugalcdep.2017.03.030
- 393 Conway, K. P., Compton, W., Stinson, F. S., & Grant, B. F. (2006). Lifetime comorbidity of  
394 DSM-IV mood and anxiety disorders and specific drug use disorders: results from the  
395 National Epidemiologic Survey on Alcohol and Related Conditions. *J Clin Psychiatry*,  
396 *67*(2), 247-257. doi:10.4088/jcp.v67n0211
- 397 Corpuz, J. C. G. (2021). Beyond death and afterlife: the complicated process of grief in the time  
398 of COVID-19. *J Public Health (Oxf)*, *43*(2), e281-e282. doi:10.1093/pubmed/fdaa247
- 399 Couzin-Frankel, J. (2022). Clues to long COVID. *Science*, *376*(6599), 1261-1265.  
400 doi:10.1126/science.add4297

- 401 Douaud, G., Lee, S., Alfaro-Almagro, F., Arthofer, C., Wang, C., McCarthy, P., . . . Smith, S. M.  
402 (2022). SARS-CoV-2 is associated with changes in brain structure in UK Biobank.  
403 *Nature*, 604(7907), 697-707. doi:10.1038/s41586-022-04569-5
- 404 Eisma, M. C., Boelen, P. A., & Lenferink, L. I. M. (2020). Prolonged grief disorder following  
405 the Coronavirus (COVID-19) pandemic. *Psychiatry Res*, 288, 113031.  
406 doi:10.1016/j.psychres.2020.113031
- 407 Ellul, M. A., Benjamin, L., Singh, B., Lant, S., Michael, B. D., Easton, A., . . . Solomon, T.  
408 (2020). Neurological associations of COVID-19. *Lancet Neurol*, 19(9), 767-783.  
409 doi:10.1016/s1474-4422(20)30221-0
- 410 Galbadage, T., Peterson, B. M., Wang, D. C., Wang, J. S., & Gunasekera, R. S. (2020).  
411 Biopsychosocial and Spiritual Implications of Patients With COVID-19 Dying in  
412 Isolation. *Front Psychol*, 11, 588623. doi:10.3389/fpsyg.2020.588623
- 413 Gonçalves Júnior, J., Moreira, M. M., & Rolim Neto, M. L. (2020). Silent Cries, Intensify the  
414 Pain of the Life That Is Ending: The COVID-19 Is Robbing Families of the Chance to  
415 Say a Final Goodbye. *Front Psychiatry*, 11, 570773. doi:10.3389/fpsyg.2020.570773
- 416 Hasin, D. S., O'Brien, C. P., Auriacombe, M., Borges, G., Bucholz, K., Budney, A., . . . Grant, B.  
417 F. (2013). DSM-5 criteria for substance use disorders: recommendations and rationale.  
418 *Am J Psychiatry*, 170(8), 834-851. doi:10.1176/appi.ajp.2013.12060782
- 419 Jankowski, P. J., Sandage, S. J., Wang, D. C., & Crabtree, S. (2022). Virtues as Mediators of the  
420 associations between Religious/Spiritual Commitment and Well-being. *Applied Research  
421 in Quality of Life*, 17(5), 2877-2901. doi:10.1007/s11482-022-10046-y

- 422 Johnson, S. S. (2021). Addressing Mental Health and Substance Use Disorders Amid and  
423 Beyond the COVID-19 Pandemic. *Am J Health Promot*, 35(2), 299-301.  
424 doi:10.1177/0890117120983982a
- 425 Koenig, H. G. (2009). Research on religion, spirituality, and mental health: a review. *Can J*  
426 *Psychiatry*, 54(5), 283-291. doi:10.1177/070674370905400502
- 427 Levine, R. L. (2022). Addressing the Long-term Effects of COVID-19. *Jama*, 328(9), 823-824.  
428 doi:10.1001/jama.2022.14089
- 429 Livne, O., Wengrower, T., Feingold, D., Shmulewitz, D., Hasin, D. S., & Lev-Ran, S. (2021).  
430 Religiosity and substance use in U.S. adults: Findings from a large-scale national survey.  
431 *Drug Alcohol Depend*, 225, 108796. doi:10.1016/j.drugalcdep.2021.108796
- 432 Lopez-Leon, S., Wegman-Ostrosky, T., Perelman, C., Sepulveda, R., Rebolledo, P. A., Cuapio,  
433 A., & Villapol, S. (2021). More than 50 long-term effects of COVID-19: a systematic  
434 review and meta-analysis. *Sci Rep*, 11(1), 16144. doi:10.1038/s41598-021-95565-8
- 435 Lowe, G. B., Wang, D. C., & Chin, E. G. (2022). Experiential Avoidance Mediates the  
436 Relationship between Prayer Type and Mental Health before and through the COVID-19  
437 Pandemic. *Religions*, 13(7), 652. Retrieved from [https://www.mdpi.com/2077-](https://www.mdpi.com/2077-1444/13/7/652)  
438 [1444/13/7/652](https://www.mdpi.com/2077-1444/13/7/652)
- 439 McEwen, B. S. (2012). Brain on stress: how the social environment gets under the skin. *Proc*  
440 *Natl Acad Sci U S A*, 109 Suppl 2(Suppl 2), 17180-17185. doi:10.1073/pnas.1121254109
- 441 Nalbandian, A., Sehgal, K., Gupta, A., Madhavan, M. V., McGroder, C., Stevens, J. S., . . . Wan,  
442 E. Y. (2021). Post-acute COVID-19 syndrome. *Nat Med*, 27(4), 601-615.  
443 doi:10.1038/s41591-021-01283-z

- 444 Qin, Y., Wu, J., Chen, T., Li, J., Zhang, G., Wu, D., . . . Zhu, W. (2021). Long-term  
445 microstructure and cerebral blood flow changes in patients recovered from COVID-19  
446 without neurological manifestations. *J Clin Invest*, *131*(8). doi:10.1172/jci147329
- 447 Rhew, I. C., Cadigan, J. M., & Lee, C. M. (2021). Marijuana, but not alcohol, use frequency  
448 associated with greater loneliness, psychological distress, and less flourishing among  
449 young adults. *Drug Alcohol Depend*, *218*, 108404.  
450 doi:10.1016/j.drugalcdep.2020.108404
- 451 Ross, S., & Peselow, E. (2012). Co-occurring psychotic and addictive disorders: neurobiology  
452 and diagnosis. *Clin Neuropharmacol*, *35*(5), 235-243.  
453 doi:10.1097/WNF.0b013e318261e193
- 454 SAMHSA. (2021). 2020 National Survey on Drug Use and Health Public Use File Codebook.  
455 *Center for Behavioral Health Statistics and Quality. Substance Abuse and Mental Health*  
456 *Services Administration (SAMHSA), Rockville, MD.*
- 457 She, K. T. R., Wang, D. C., Canada, A. L., & Poston, J. M. (2022). The Impact of Financial  
458 Health on the Spiritual, Mental, and Relational Health of Christian Graduate Students.  
459 *Pastoral Psychology*. doi:10.1007/s11089-022-01031-1
- 460 Smith, C. L., Waters, S. F., Spellacy, D., Burduli, E., Brooks, O., Carty, C. L., . . . Barbosa-  
461 Leiker, C. (2022). Substance use and mental health in pregnant women during the  
462 COVID-19 pandemic. *J Reprod Infant Psychol*, *40*(5), 465-478.  
463 doi:10.1080/02646838.2021.1916815
- 464 Smith, K., Wang, D., Canada, A., Poston, J. M., Bee, R., & Hurlbert, L. (2022). The  
465 biobehavioral family model with a seminarian population: A systems perspective of  
466 clinical care. *Front Psychol*, *13*, 859798. doi:10.3389/fpsyg.2022.859798



- 467 Verdery, A. M., Smith-Greenaway, E., Margolis, R., & Daw, J. (2020). Tracking the reach of  
468 COVID-19 kin loss with a bereavement multiplier applied to the United States. *Proc Natl*  
469 *Acad Sci U S A*, *117*(30), 17695-17701. doi:10.1073/pnas.2007476117
- 470 Weber, S. R., & Pargament, K. I. (2014). The role of religion and spirituality in mental health.  
471 *Curr Opin Psychiatry*, *27*(5), 358-363. doi:10.1097/ycp.0000000000000080
- 472 Weinberger, A. H., Pacek, L. R., Sheffer, C. E., Budney, A. J., Lee, J., & Goodwin, R. D. (2019).  
473 Serious psychological distress and daily cannabis use, 2008 to 2016: Potential  
474 implications for mental health? *Drug Alcohol Depend*, *197*, 134-140.  
475 doi:10.1016/j.drugalcdep.2019.01.010
- 476 Wolitzky-Taylor, K., Operskalski, J. T., Ries, R., Craske, M. G., & Roy-Byrne, P. (2011).  
477 Understanding and treating comorbid anxiety disorders in substance users: review and  
478 future directions. *J Addict Med*, *5*(4), 233-247. doi:10.1097/ADM.0b013e31823276d7
- 479 Wood, Z. B., Wang, D. C., Lee, C., Barnes, H., Abouezzeddine, T., Canada, A., & Aten, J.  
480 (2021). Social support, religious coping, and traumatic stress among Hurricane Katrina  
481 survivors of southern Mississippi: A sequential mediational model. *Traumatology*, *27*,  
482 336-345. doi:10.1037/trm0000328
- 483 Yang, A. C., Kern, F., Losada, P. M., Agam, M. R., Maat, C. A., Schmartz, G. P., . . . Wyss-  
484 Coray, T. (2021). Dysregulation of brain and choroid plexus cell types in severe COVID-  
485 19. *Nature*, *595*(7868), 565-571. doi:10.1038/s41586-021-03710-0  
486

487 **Figures**

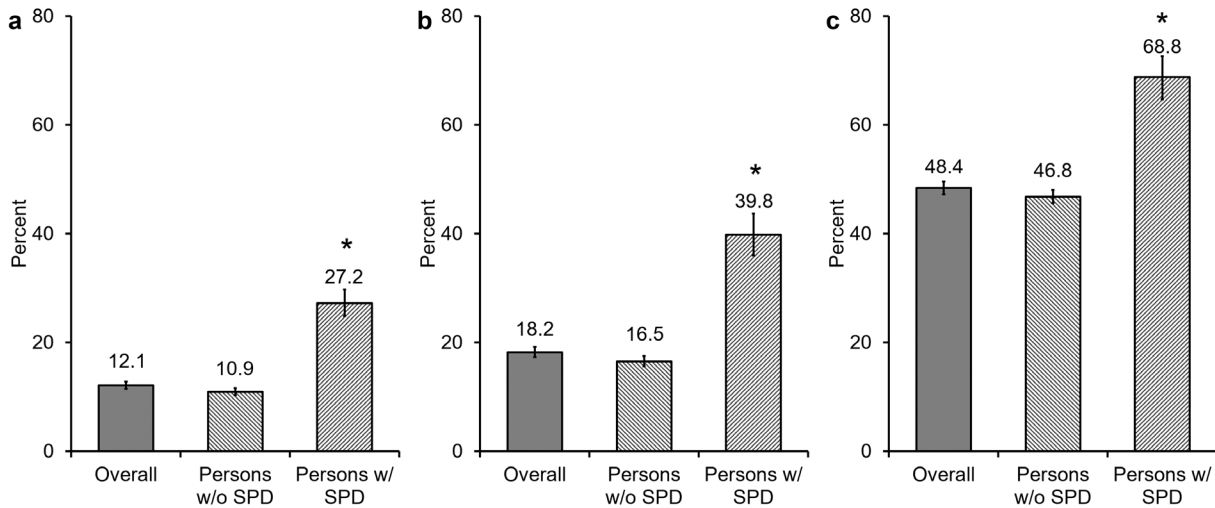

488

489 **Figure 1. Prevalence of marijuana use comparing persons without (w/o) serious**  
490 **psychological distress (SPD) and person with (w/) SPD.** Secondary data was obtained from the  
491 2020 National Survey on Drug Use and Health (NSDUH) conducted by the Center for  
492 Behavioral Health Statistics and Quality within the Substance Abuse and Mental Health  
493 Services. NSDUH used the Kessler-6 (K6) screening instrument to assess serious psychological  
494 distress (SPD) among respondents aged 18 or older. (a) past-month marijuana use, (b) past-year  
495 marijuana use, and (c) ever use of marijuana. Past-month marijuana use indicates CMU status  
496 during the COVID-19 pandemic. Error bars represent the upper and lower limits of the 95%  
497 confidence intervals (C.I.s) \* Statistically significant differences between persons with SPD and  
498 persons without SPD: if the confidence intervals are not overlapping, the difference between the  
499 value is significantly different.
